# Supplementary material
Source: MDPI journal article supplement (https://www.mdpi.com/2227-9717/11/4/1069)
Supplement: s1 [file s1 › processes-2308536-supplementary.pdf]

# **Supplementary Materials for Fabrication of Ni-MOF-74@PA-PEI for Radon Removal under Ambient Conditions**

**Xi Liu <sup>1,2</sup>, Yuan Sun <sup>2</sup>, Chunlai Wang <sup>2</sup>, Li Lv <sup>2,\*</sup> and Yun Liang <sup>1,\*</sup>**

1 School of Light Industry and Engineering, South China University of Technology,  
Guangzhou 510640, China

2 State Key Laboratory of NBC Protection for Civilian, Beijing 102205, China

\* Correspondence: shxllv@163.com(L.L.); liangyun@scut.edu.cn(Y.L.)

## 1. Experimental section

The amount of MOF loaded on the substrate can be given as a loading fraction, which means the total mass of MOF on the substrate per unit mass of the substrate. The loading rate of Ni-MOF-74 on PA-PEI substrate is calculated according to the equation below:

$$\text{Loading amount} = \frac{m_{\text{MOF@PA-PEI}} - m_{\text{PA-PEI}}}{m_{\text{PA-PEI}}} \times 100\%$$

## 2. Characterization of samples

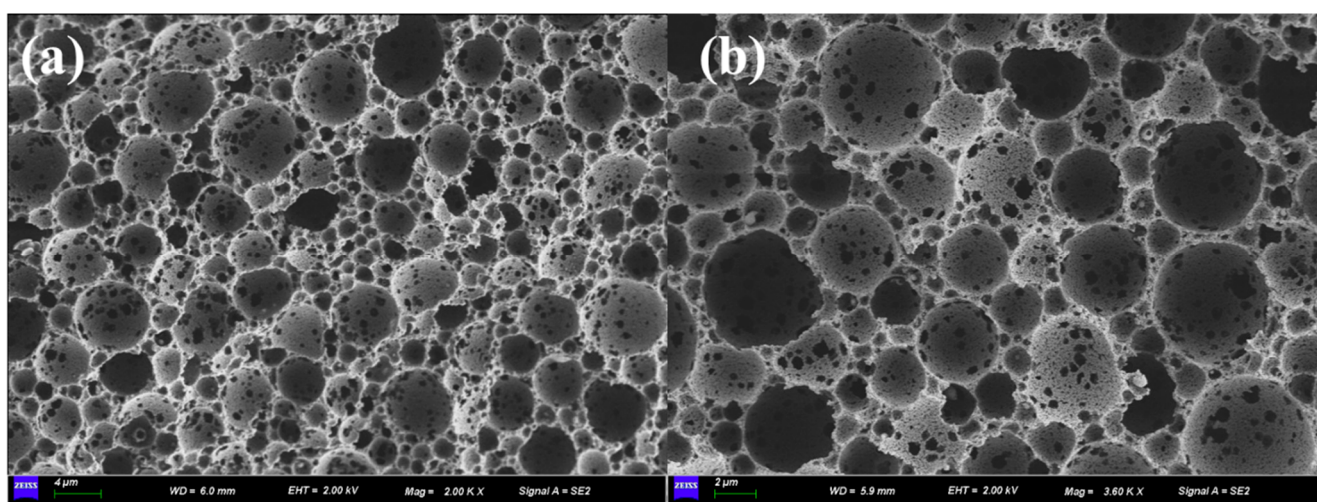

Figure S1. Internal pore structure of PA-PEI

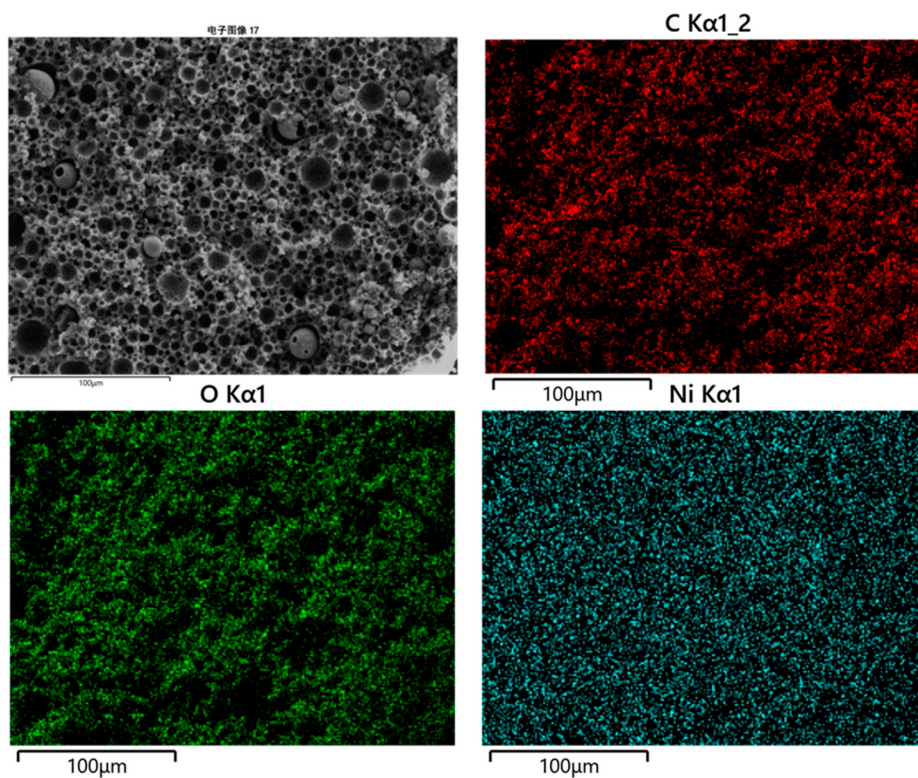

**Figure S2.** SEM/energy dispersive X-ray spectroscopy mappings of interior of Ni-MOF-74@PA-PEI.

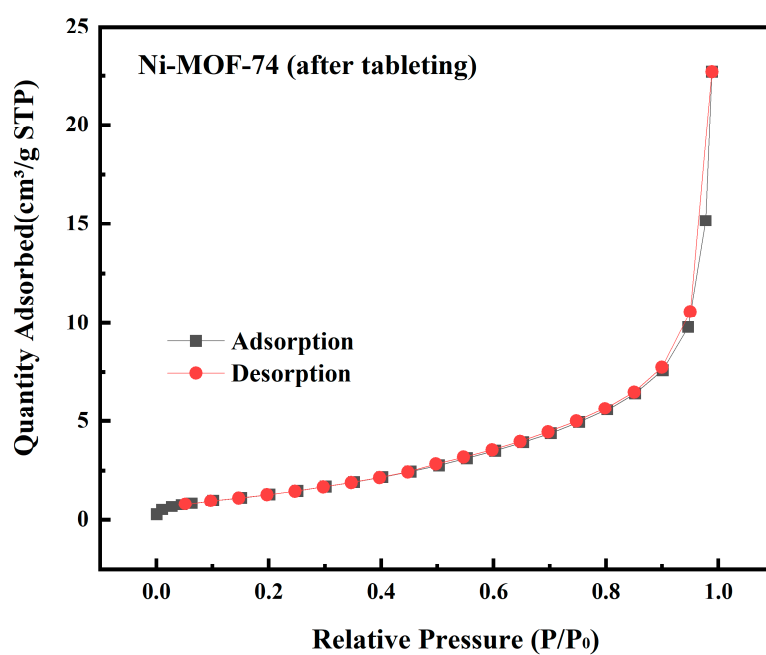

**Figure S3.** N<sub>2</sub> adsorption/desorption isotherms of Ni-MOF-74(after tableting)

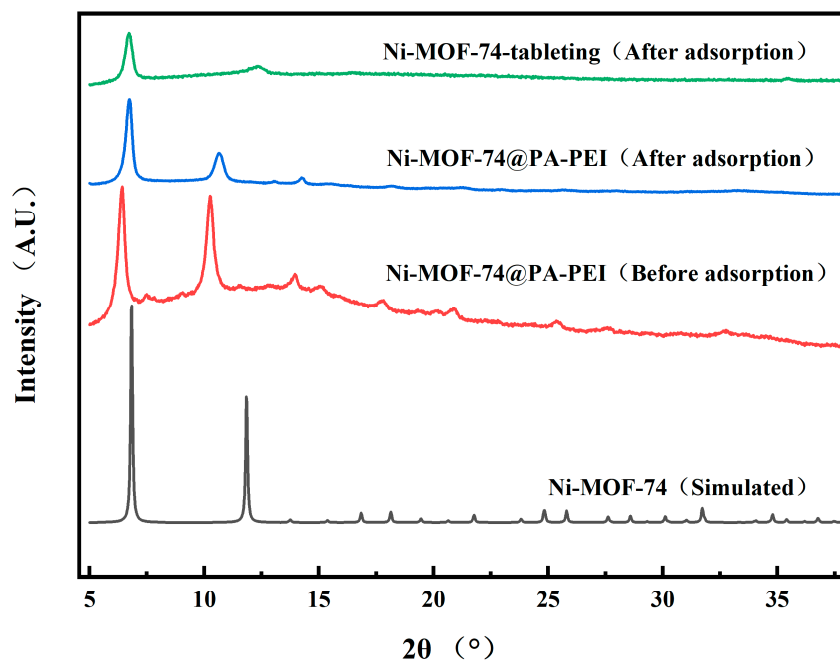

**Figure S4.** X-ray diffraction patterns of several materials.
